# Supplementary material for: Developmental transitions in amygdala PKC isoforms and AMPA receptor expression associated with threat memory in infant rats
Source: PubMed Central journal article supplement (PMC6168531; doi:10.1038/s41598-018-32762-y), 2018-10-02
Supplement: 41598_2018_32762_MOESM1_ESM.pdf [file 41598_2018_32762_MOESM1_ESM.pdf]

*Scientific Reports*

Supplementary Information

Developmental transitions in amygdala PKC isoforms and  
AMPA receptor expression associated with threat memory  
in infant rats

**Authors:** Maya Opendak<sup>1,2\*</sup>, Roseanna M. Zanca<sup>3,4</sup>, Eben Anane<sup>2</sup>,  
Peter A. Serrano<sup>3,4†</sup>, Regina M. Sullivan<sup>1,2†</sup>

### Supplementary Figure 1.

GluA2 Blots (100 kDa)

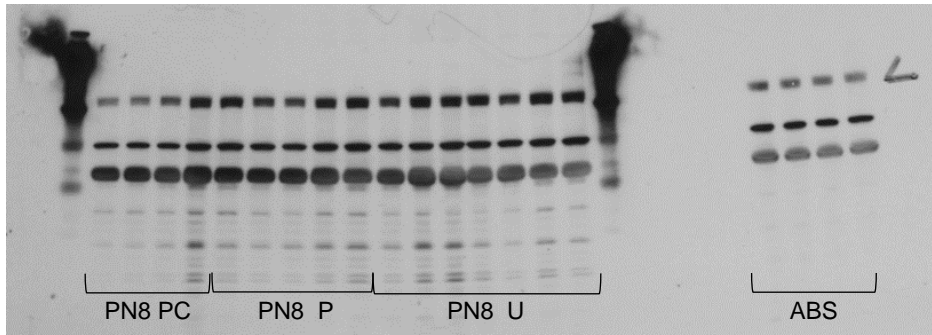

◀ GluA2

α-Tubulin comparison: Fig. 5c

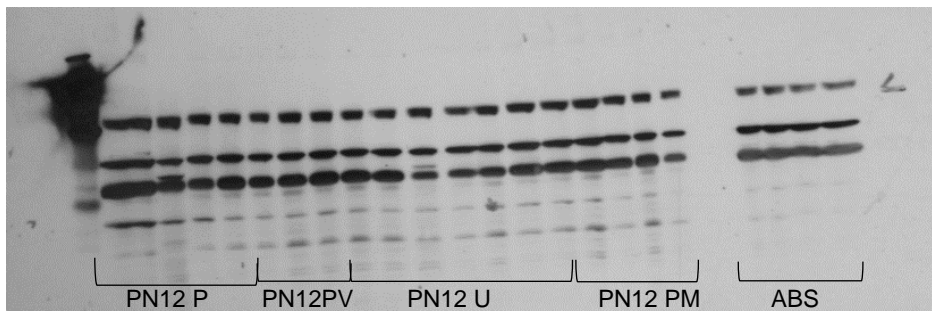

◀ GluA2

α-Tubulin comparison: Fig. 5d

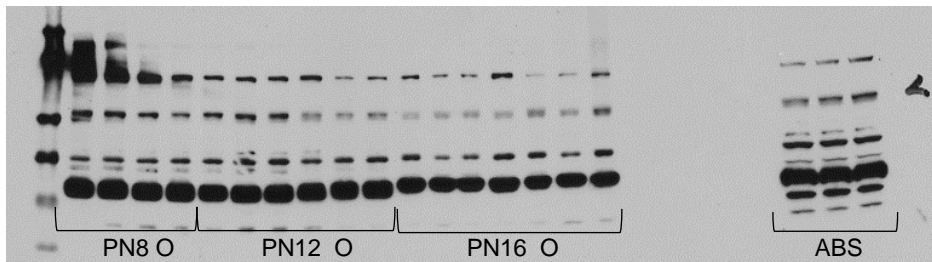

◀ GluA2

α-Tubulin comparison: Fig. 5f

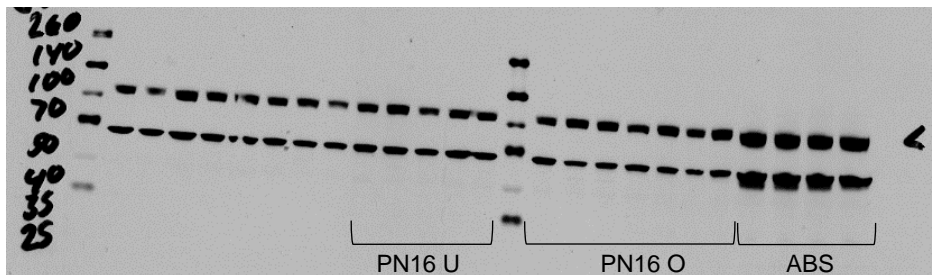

◀ GluA2

α-Tubulin comparison: Fig. 5k

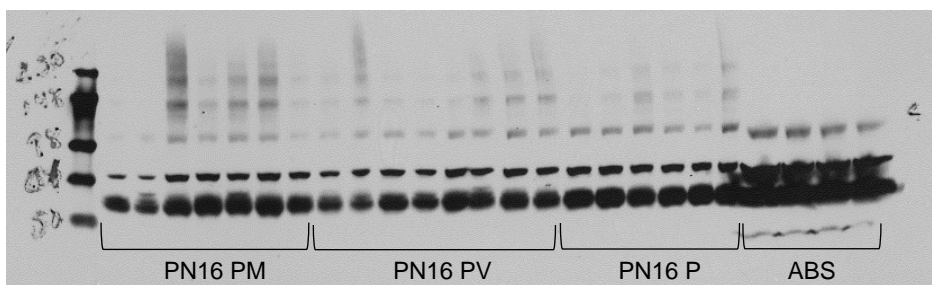

◀ GluA2

α-Tubulin comparison: Fig. 5l

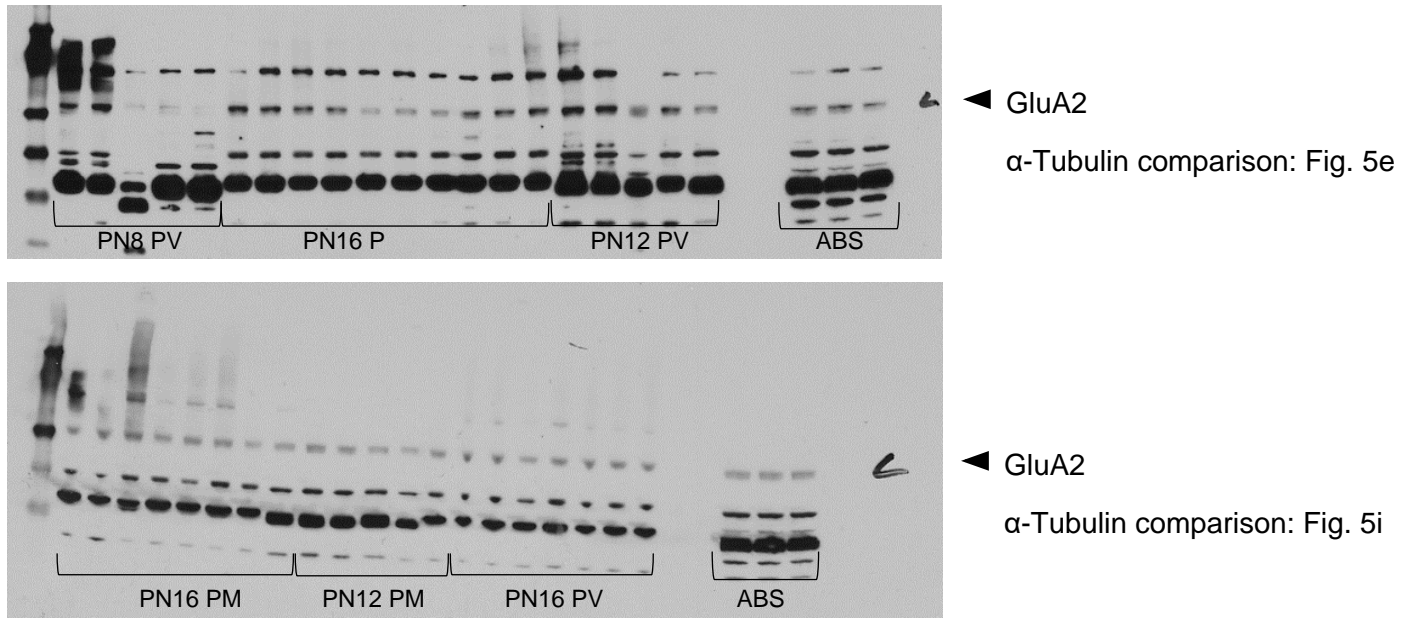

**Supp. Figure 1.** Western blot showing GluA2 (100 kDa, arrow) levels in amygdalae of pups conditioned at age postnatal day (PN)8, PN12 and PN16 and sac'd 24 hr later. P/U/O: Paired, Unpaired, Odor only conditioning. PC/PM/PV: Paired+CORT, Paired+Metyrapone, Paired+Vehicle. ABS: All brain sample, positive control. Empty lanes were loaded with 1x Laemmli Buffer. The same tubulin-corrected values were used for all markers probed. Comparisons were made across gels processed in parallel using samples derived from the same experiment. Unmarked blots were run as part of a separate study.

## Supplementary Figure 2.

GluA1 Blots (100 kDa)

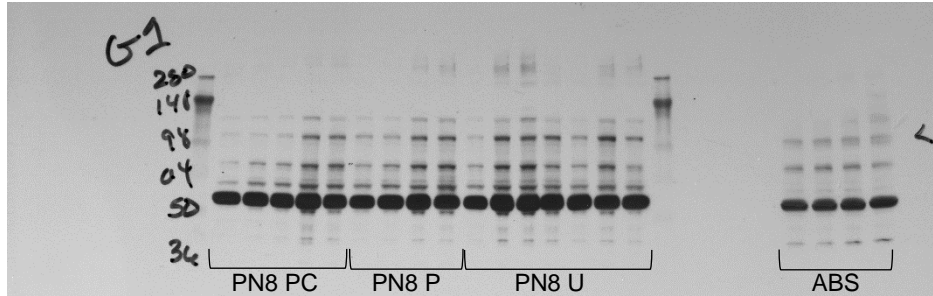

◀ GluA1  
 $\alpha$ -Tub comparison: Fig. 5c

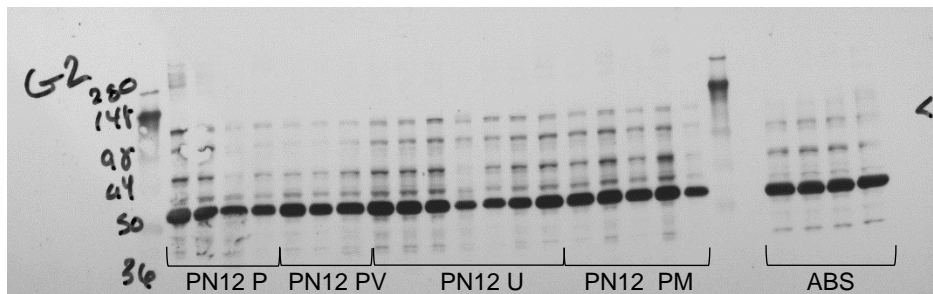

◀ GluA1  
 $\alpha$ -Tubulin comparison: Fig. 5d

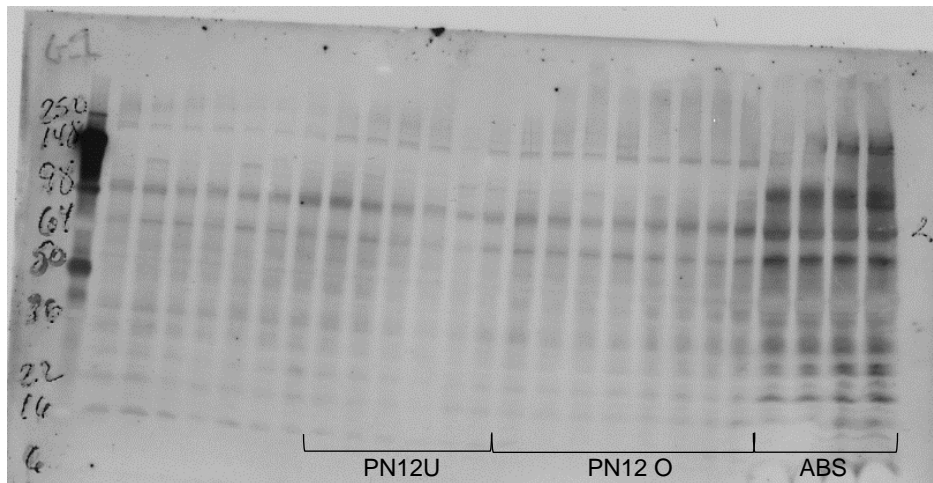

◀ GluA1  
 $\alpha$ -Tubulin comparison: Fig. 5j

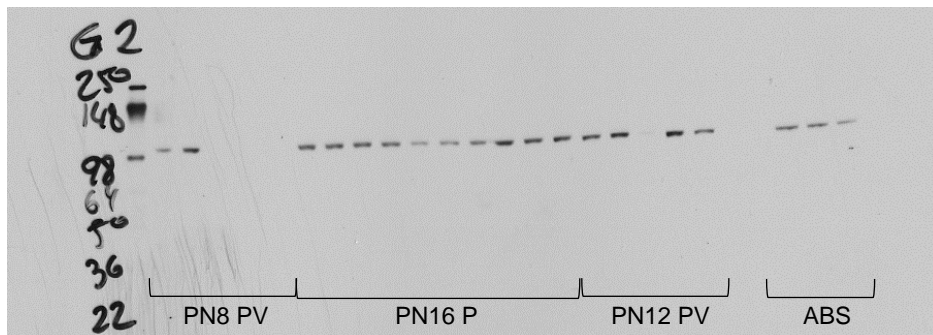

◀ GluA1  
 $\alpha$ -Tubulin comparison: Fig. 5e

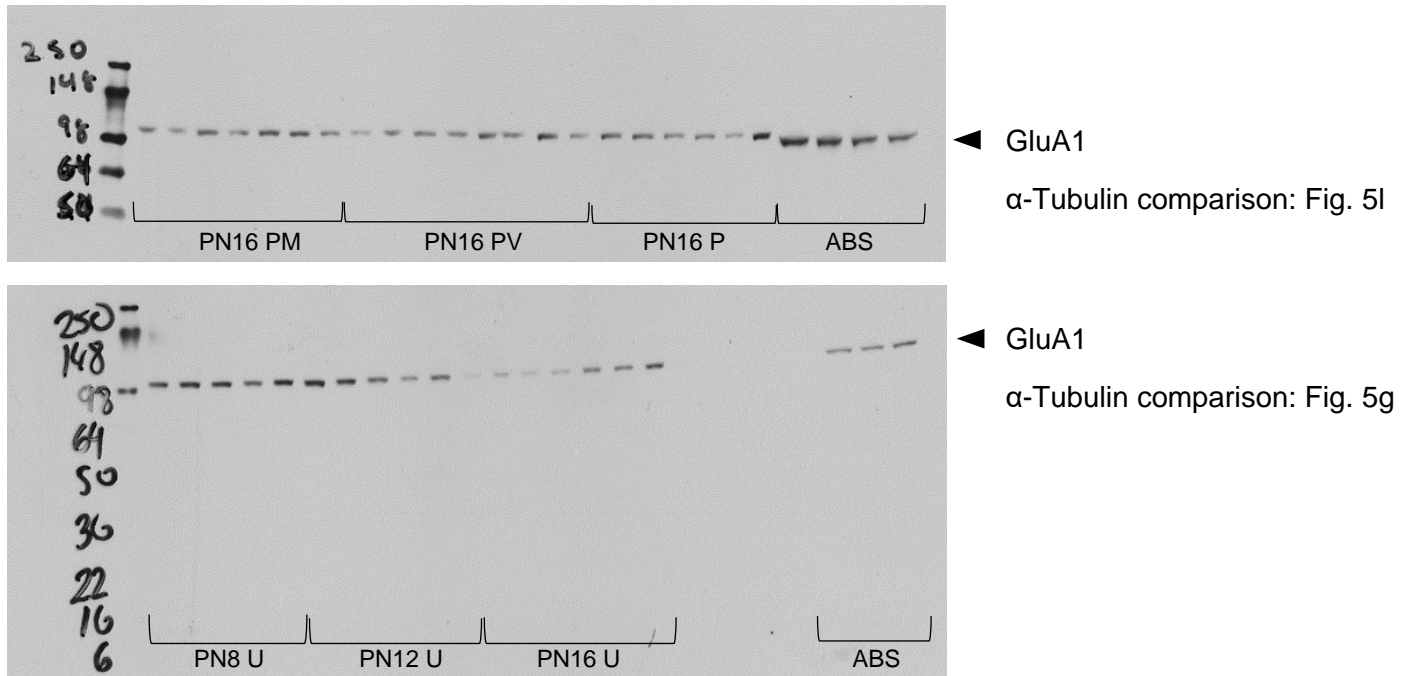

**Supp. Figure 2.** Western blot showing GluA1 (100 kDa, arrow) levels in amygdalae of pups conditioned at age postnatal day (PN)8, PN12 and PN16 and sac'd 24 hr later. P/U/O: Paired, Unpaired, Odor only conditioning. PC/PM/PV: Paired+CORT, Paired+Metyrapone, Paired+Vehicle. ABS: All brain sample, positive control. Empty lanes were loaded with 1x Laemmli Buffer. The same tubulin-corrected values were used for all markers probed. Comparisons were made across gels processed in parallel using samples derived from the same experiment. Unmarked blots were run as part of a separate study.

### Supplementary Figure 3.

PKM $\zeta$  Blots (55 kDa)

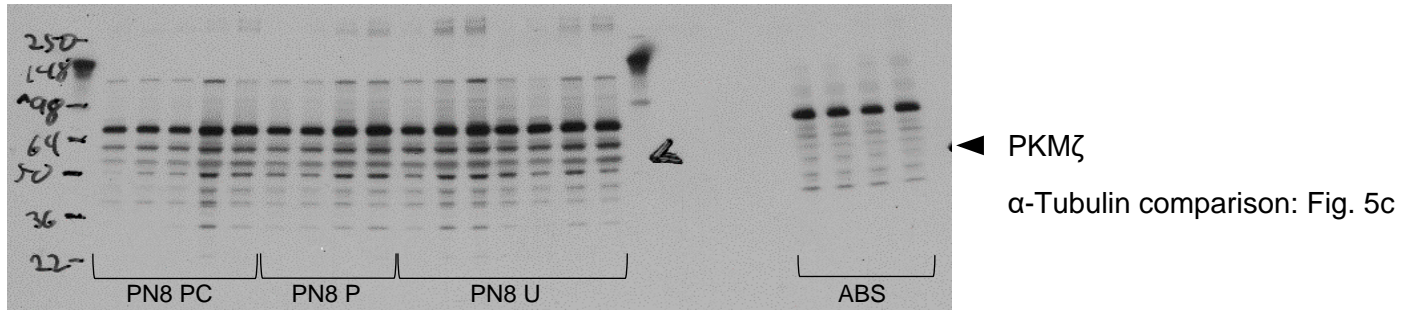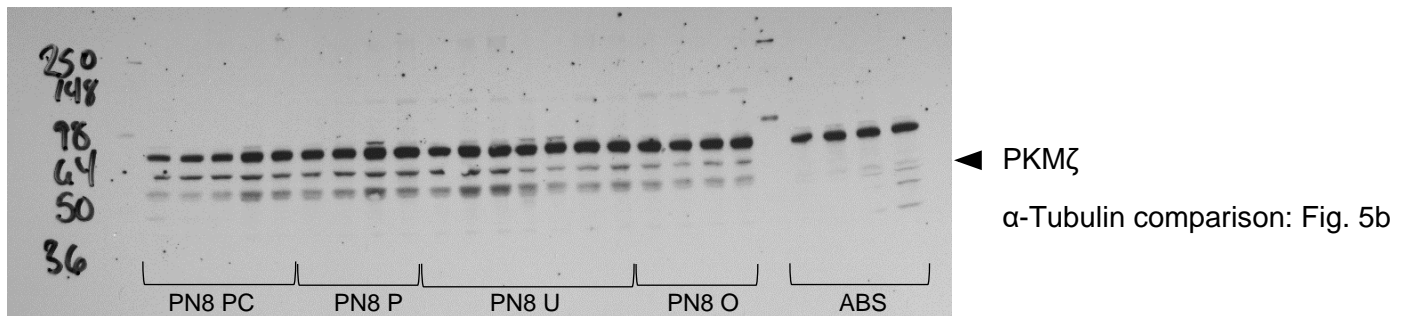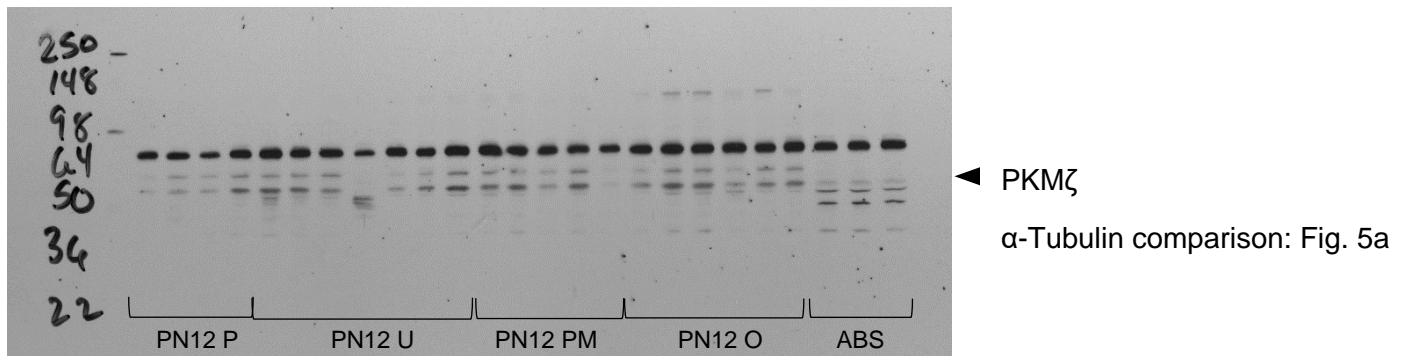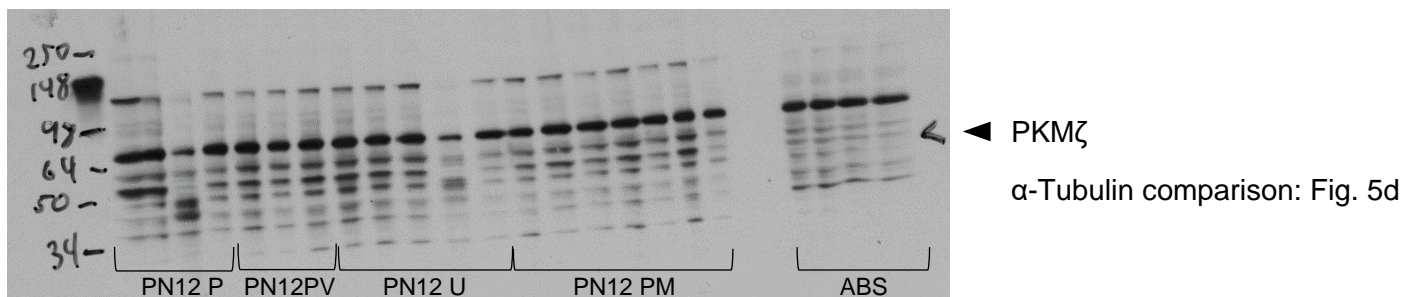



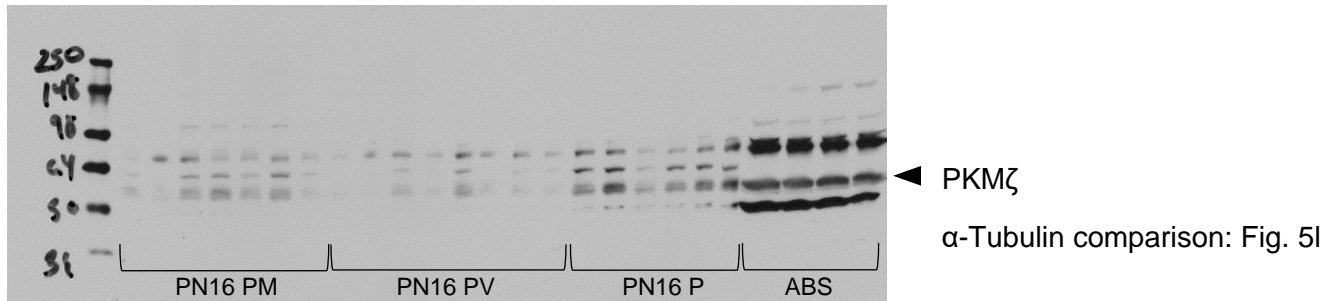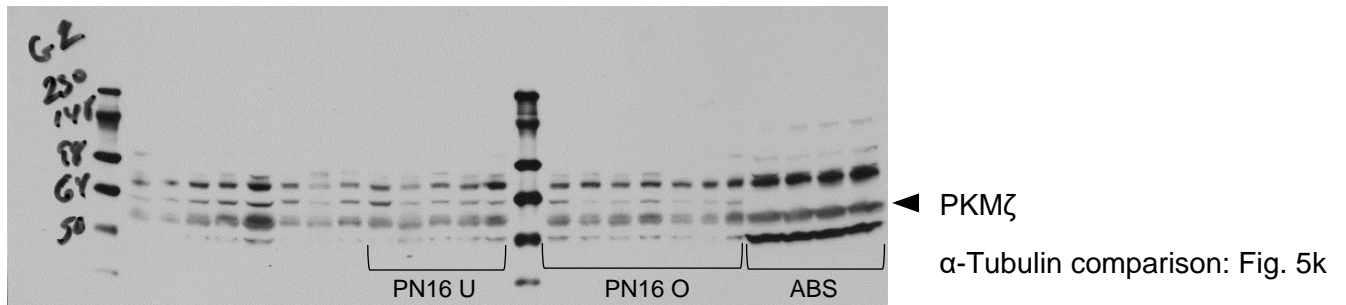

**Supp. Figure 3.** Western blot showing PKM $\zeta$  (55 kDa, arrow) levels in amygdalae of pups conditioned at age postnatal day (PN)8, PN12 and PN16 and sac'd 24 hr later. P/U/O: Paired, Unpaired, Odor only conditioning. PC/PM/PV: Paired+CORT, Paired+Metyrapone, Paired+Vehicle. ABS: All brain sample, positive control. Empty lanes were loaded with 1x Laemmli Buffer. The same tubulin-corrected values were used for all markers probed. Comparisons were made across gels processed in parallel using samples derived from the same experiment. Unmarked blots were run as part of a separate study.

**Supplementary Figure 4.**

PKC  $\iota/\lambda$  Blots (70 kDa)

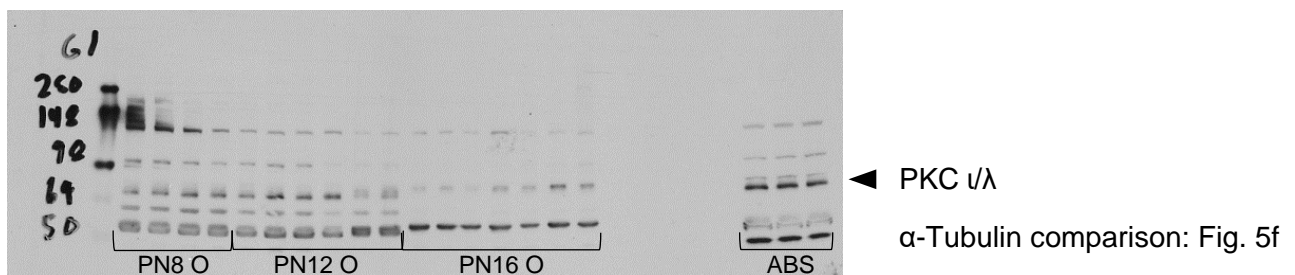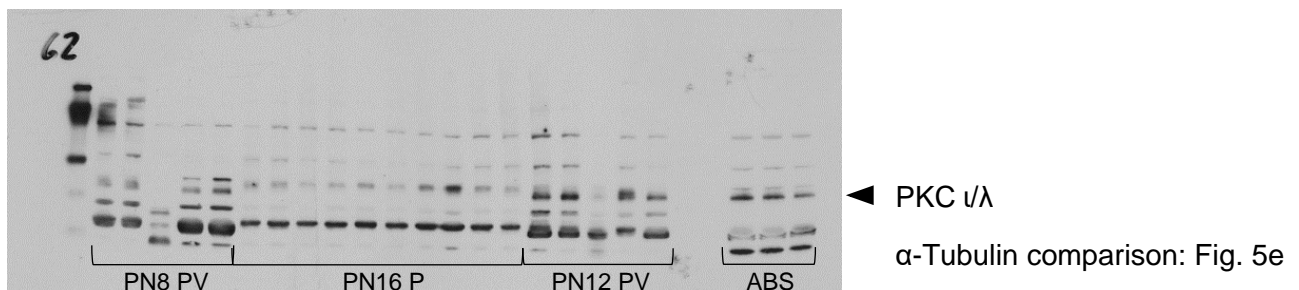

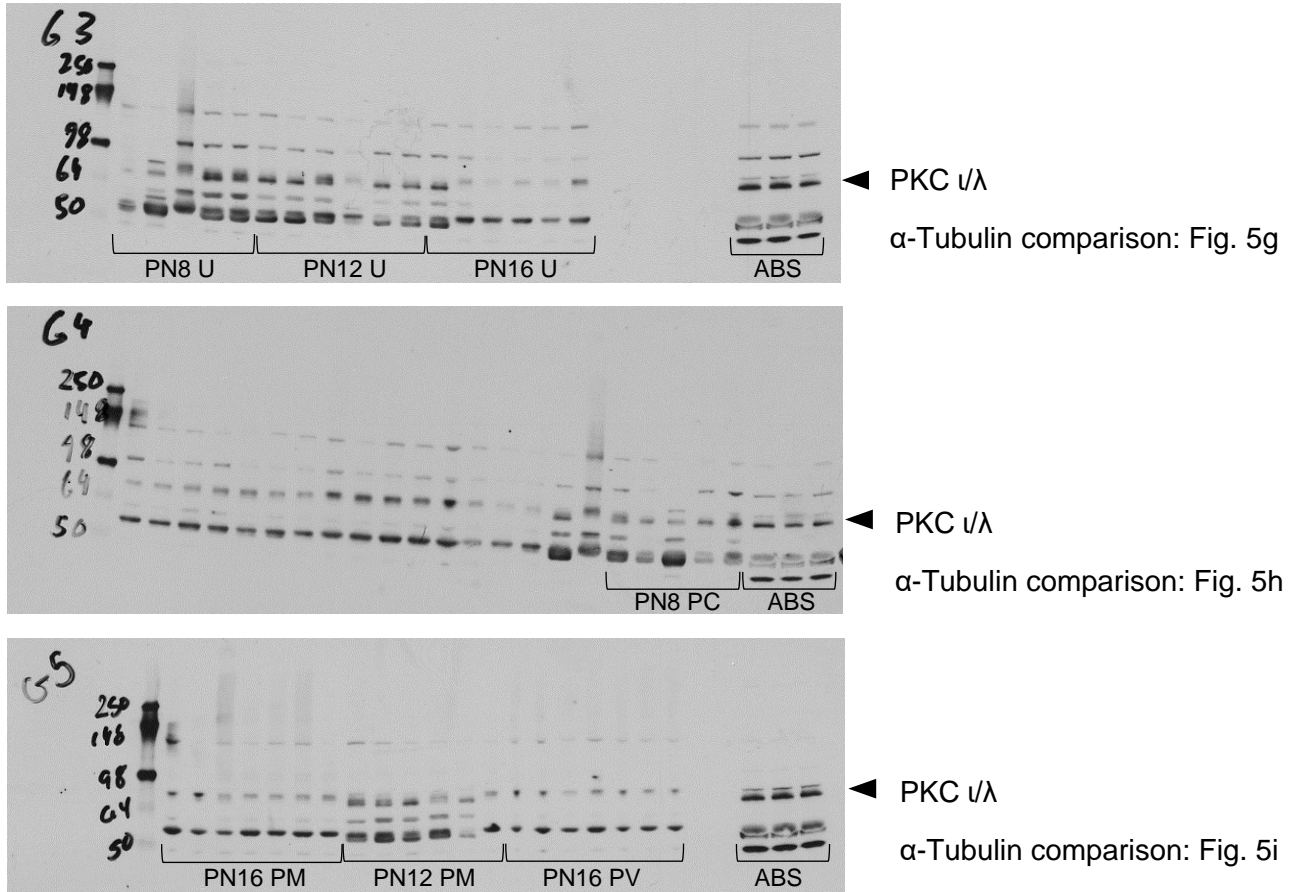

**Supp. Figure 4.** Western blot showing PKC $\iota/\lambda$  (70 kDa, arrow) levels in amygdalae of pups conditioned at age postnatal day (PN)8, PN12 and PN16 and sac'd 24 hr later. P/U/O: Paired, Unpaired, Odor only conditioning. PC/PM/PV: Paired+CORT, Paired+Metyrapone, Paired+Vehicle. ABS: All brain sample, positive control. Empty lanes were loaded with 1x Laemmli Buffer. The same tubulin-corrected values were used for all markers probed. Comparisons were made across gels processed in parallel using samples derived from the same experiment. Unmarked blots were run as part of a separate study.

**Supplementary Figure 5.**

$\alpha$ -Tubulin Blots (50 kDa)

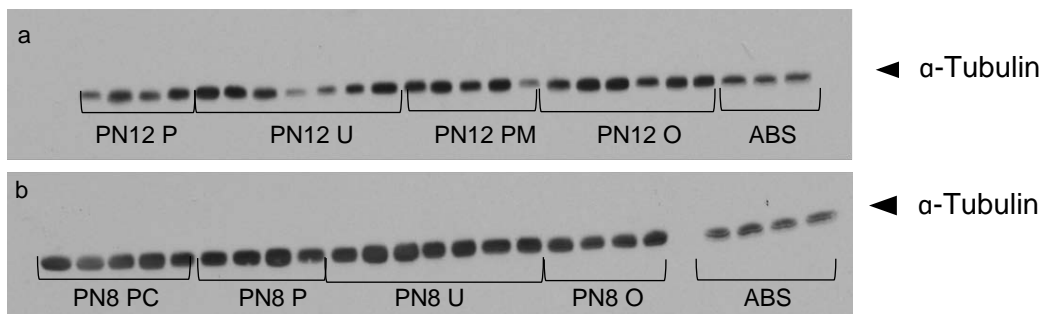



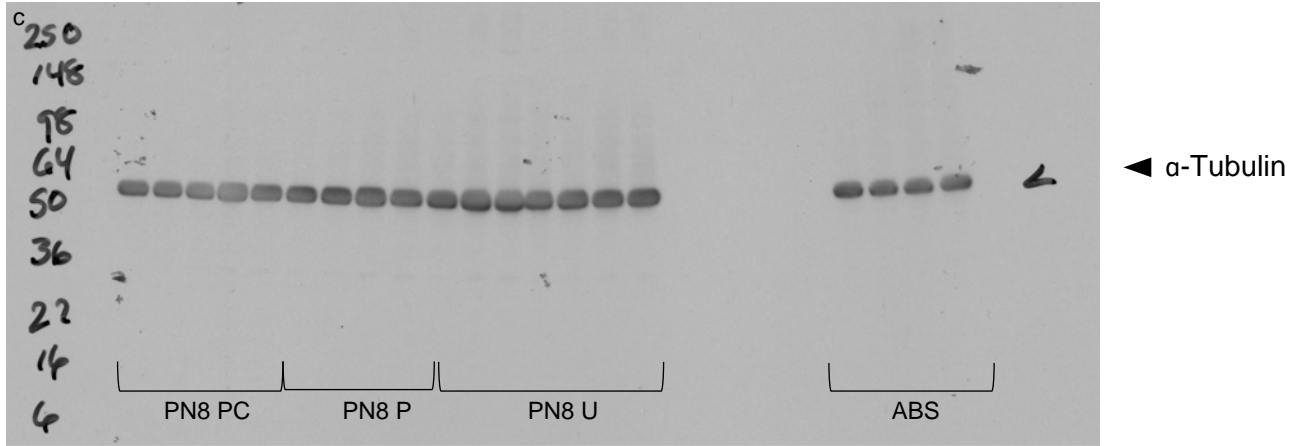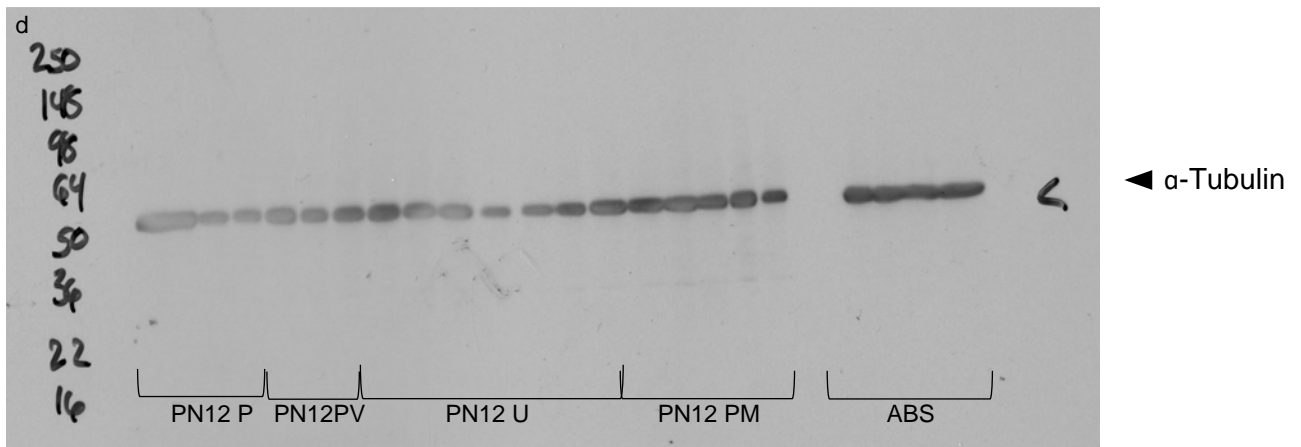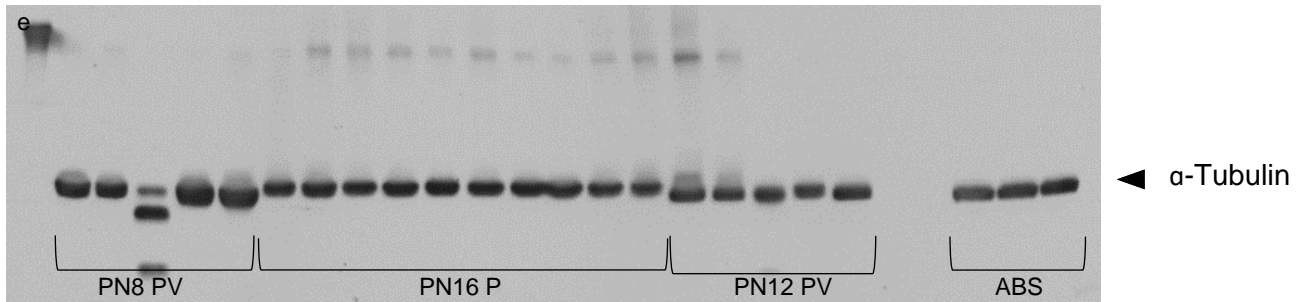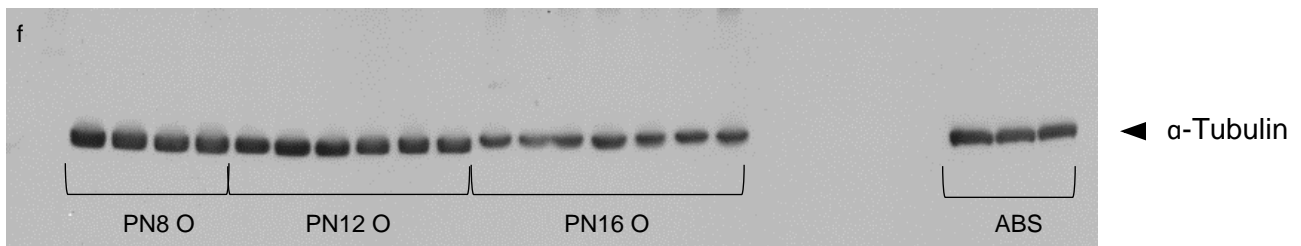

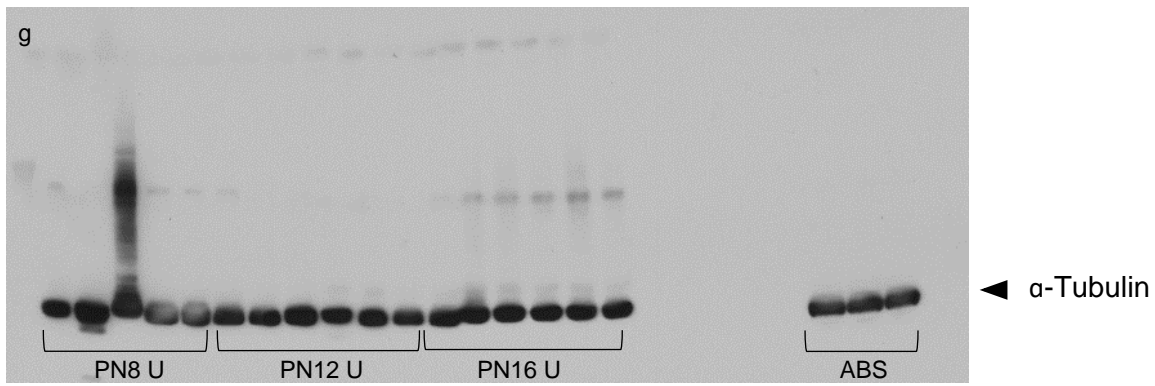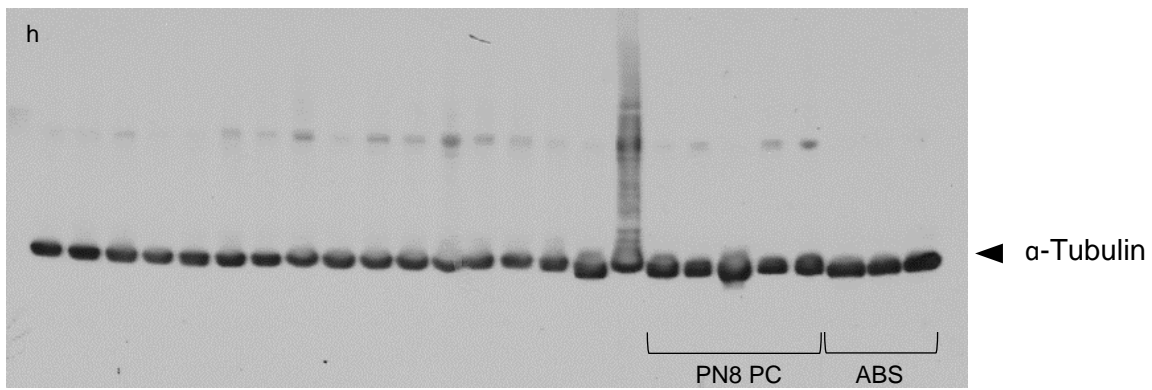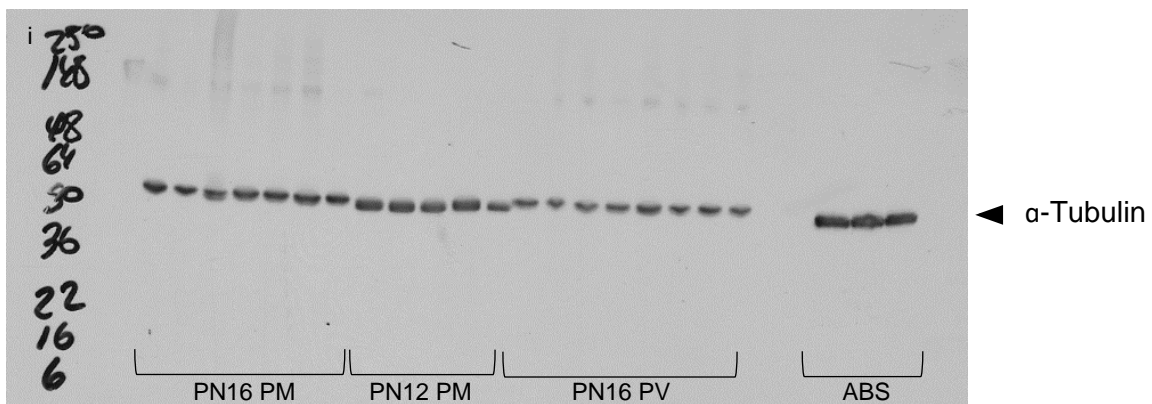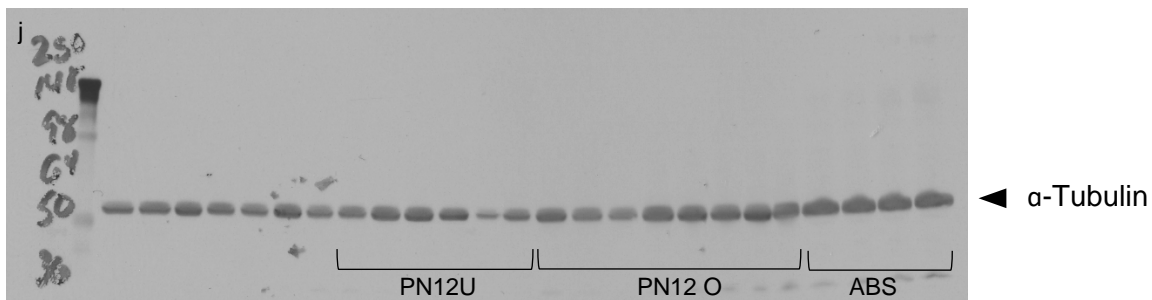

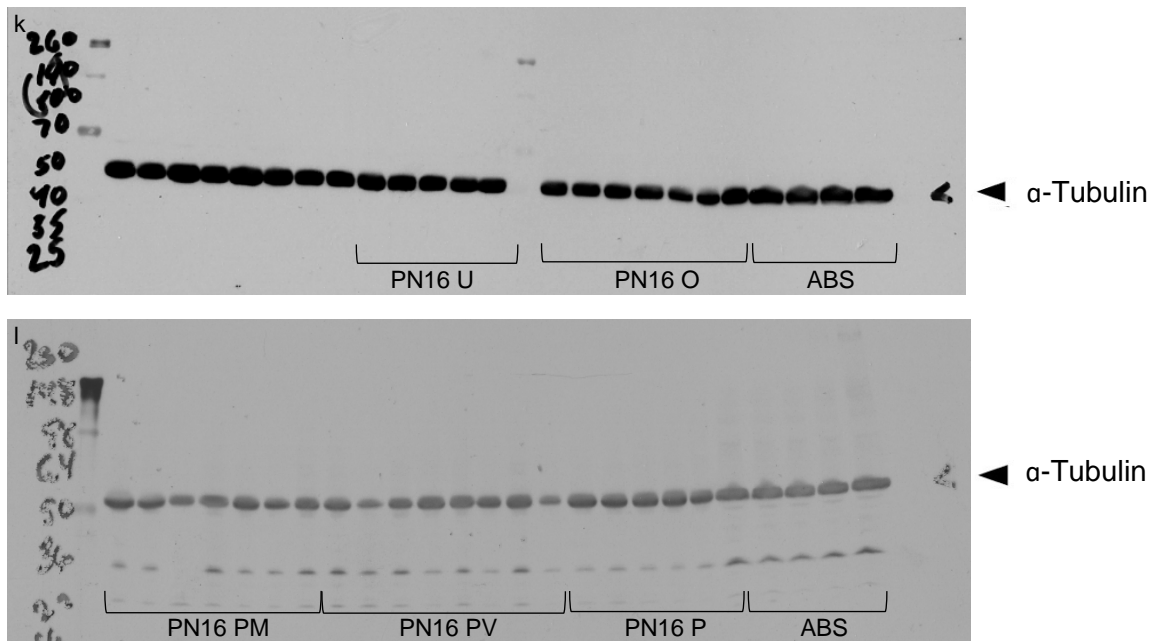

**Supp. Figure 5.** Western blot showing  $\alpha$ -Tubulin (50 kDa, arrow) levels in amygdalae of pups conditioned at age postnatal day (PN)8, PN12 and PN16 and sac'd 24 hr later. P/U/O: Paired, Unpaired, Odor only conditioning. PC/PM/PV: Paired+CORT, Paired+Metyrapone, Paired+Vehicle. ABS: All brain sample, positive control. Empty lanes were loaded with 1x Laemmli Buffer. The same tubulin-corrected values were used for all markers probed. Comparisons were made across gels processed in parallel using samples derived from the same experiment. Unmarked blots were run as part of a separate study.

PN8

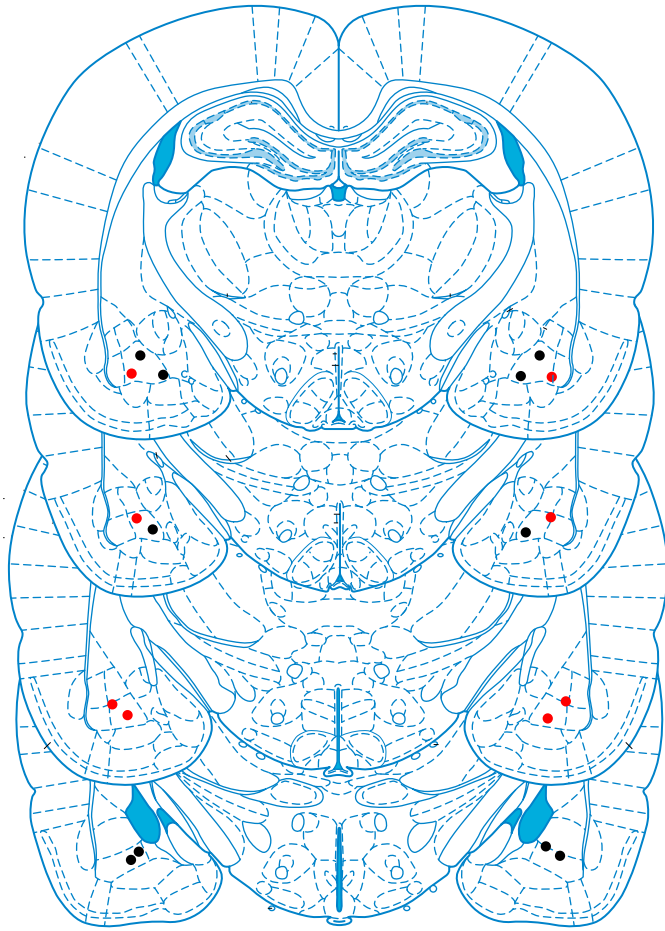

PN12

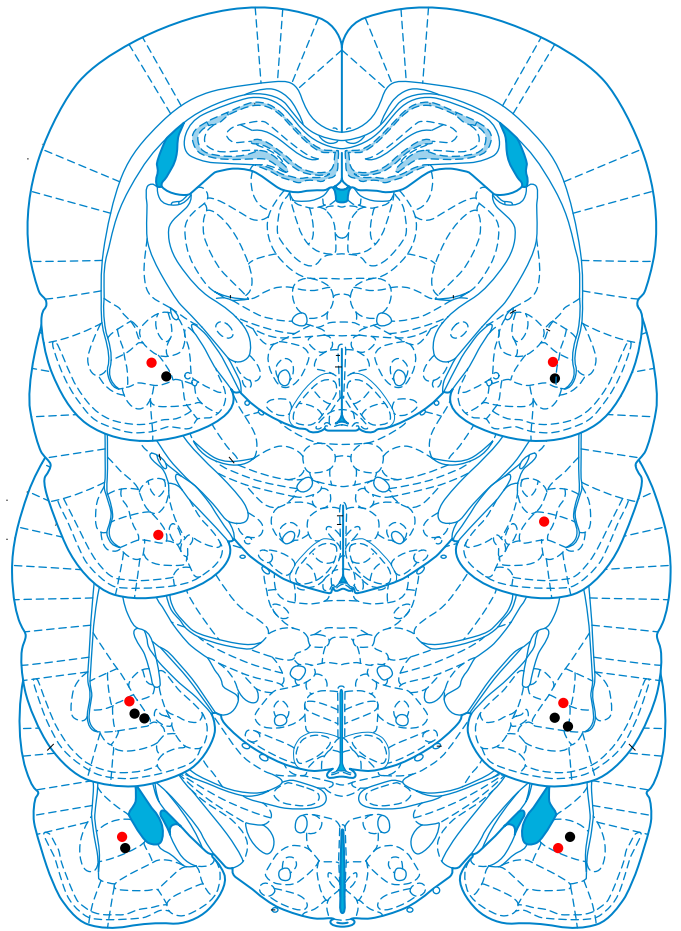

PN16

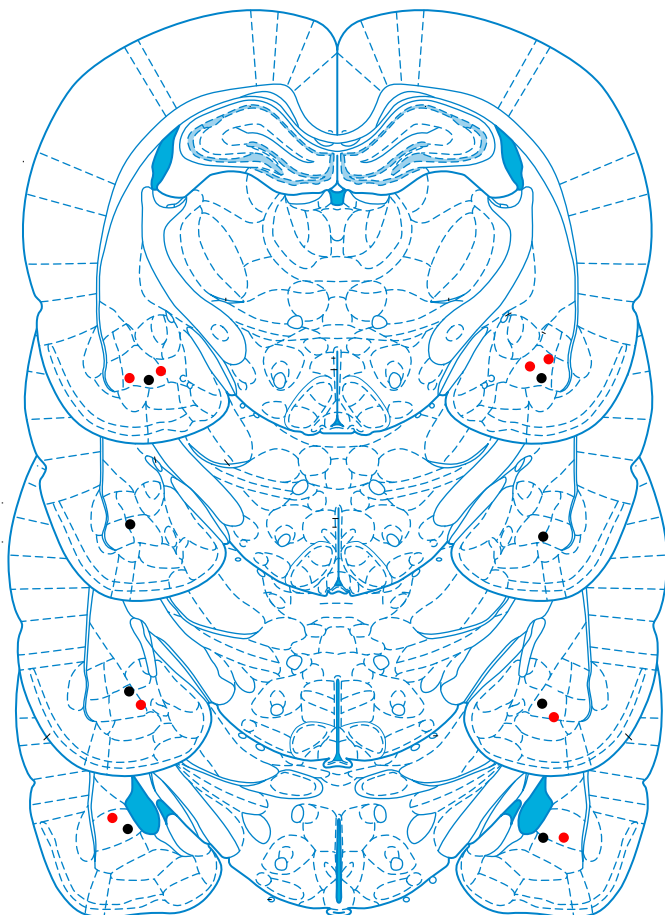

**Supplementary Figure 6.** Representative histology confirming cannula placement for pups receiving ZIP or Scrambled ZIP in Experiment 3 (Fig 4). Due to the large number of animals used, 4-5 representative pups per age per condition are shown here. Red dots, ZIP; black dots, Scr-ZIP.
